# Supplementary material
Source: PubMed Central journal article supplement (PMC7966491)
Supplement: 3662_table.pdf [file 3662_table.pdf]

**On-line Table: Summary of the flow measurements from USD and DSA for each of the 22 patients<sup>a</sup>**

| Patient | Q <sub>i</sub> (mL/s) | Q <sub>x</sub> (mL/s) | Q <sub>D</sub> | I <sub>q</sub> (mL/s) | Diameter (mm) |
|---------|-----------------------|-----------------------|----------------|-----------------------|---------------|
| 1       | 2                     | 4.0117                | 3.6925         | 0.54163               | 5.11          |
|         | 2                     | 4.0395                | 3.6925         | 0.54163               | 5.11          |
| 2       | 1.5                   | 2.0066                | 2.1634         | 0.69334               | 4.6           |
|         | 2                     | 2.0308                | 2.1634         | 0.92446               | 4.6           |
| 3       | 1.5                   | 2.4592                | 3.7102         | 0.40429               | 3.75          |
|         | 2                     | 2.6617                | 3.7102         | 0.53905               | 3.75          |
| 4       | 1.5                   | 2.5882                | 2.2598         | 0.66377               | 4.59          |
|         | 2                     | 2.3178                | 2.2598         | 0.88503               | 4.59          |
| 5       | 1.5                   | 1.4067                | 2.6843         | 0.55881               | 4.82          |
|         | 2                     | 1.5721                | 2.6843         | 0.74508               | 4.82          |
| 6       | 1.5                   | 2.4252                | 4.4251         | 0.33898               | 4.48          |
|         | 2                     | 2.8914                | 4.4251         | 0.45197               | 4.48          |
| 7       | 1.5                   | 3.5826                | 2.7581         | 0.54385               | 5.21          |
|         | 2                     | 3.7146                | 2.7581         | 0.72513               | 5.21          |
| 8       | 1.5                   | 2.032                 | 7.0069         | 0.21407               | 4.64          |
|         | 3                     | 2.0964                | 7.0069         | 0.35679               | 4.64          |
| 9       | 1.5                   | 4.0089                | 6.3248         | 0.23716               | 4.93          |
|         | 2                     | 4.6051                | 6.3248         | 0.31622               | 4.93          |
|         | 3                     | 5.395                 | 6.3248         | 0.47432               | 4.93          |
| 10      | 1.5                   | 3.1286                | 2.7458         | 0.54629               | 5.34          |
|         | 2                     | 2.9829                | 2.7458         | 0.72839               | 5.34          |
| 11      | 1.5                   | 2.758                 | 3.9            | 0.38461               | 5.6           |
|         | 2                     | 2.6211                | 3.9            | 0.51282               | 5.6           |
|         | 3                     | 2.9809                | 3.9            | 0.76923               | 5.6           |
| 12      | 1.5                   | 4.0281                | 4.322          | 0.34706               | 5.66          |
|         | 2                     | 4.2702                | 4.322          | 0.46275               | 5.66          |
|         | 3                     | 3.7612                | 4.322          | 0.69413               | 5.66          |
| 13      | 1.5                   | 2.7776                | 2.8433         | 0.52756               | 4.62          |
|         | 2                     | 2.9979                | 2.8433         | 0.70342               | 4.62          |
|         | 3                     | 2.2147                | 2.8433         | 1.0551                | 4.62          |
| 14      | 1.5                   | 3.0317                | 3.611          | 0.4154                | 4.77          |
|         | 3                     | 2.7661                | 3.611          | 0.8308                | 4.77          |
| 15      | 2                     | 3.3701                | 3.6003         | 0.5555                | 4.5           |
|         | 3                     | 0.19559               | 3.6003         | 0.83326               | 4.5           |
| 16      | 1.5                   | 1.0706                | 2.0484         | 0.73228               | 4.74          |
|         | 2                     | 1.0932                | 2.0484         | 0.97637               | 4.74          |
|         | 3                     | 1.731                 | 2.0484         | 1.4646                | 4.74          |
| 17      | 1.5                   | 2.5893                | 4.7536         | 0.31555               | 4.35          |
|         | 2                     | 2.7015                | 4.7536         | 0.42073               | 4.35          |
|         | 3                     | 2.9125                | 4.7536         | 0.6311                | 4.35          |
| 18      | 1.5                   | 1.3991                | 1.6474         | 0.91055               | 4.83          |
|         | 2                     | 1.4663                | 1.6474         | 1.2141                | 4.83          |
|         | 3                     | 1.4391                | 1.6474         | 1.8211                | 4.83          |
| 19      | 1.5                   | 1.7915                | 1.383          | 1.0846                | 5.1           |
|         | 3                     | 2.5066                | 1.383          | 2.1691                | 5.1           |
| 20      | 1.5                   | 1.2213                | 0.89105        | 1.6834                | 3.99          |
|         | 2                     | 1.2636                | 0.89105        | 2.2446                | 3.99          |
|         | 3                     | 0.96926               | 0.89105        | 3.3668                | 3.99          |
| 21      | 1.5                   | 1.9561                | 0.79165        | 1.8948                | 4.72          |
|         | 3                     | 1.9803                | 0.79165        | 3.7895                | 4.72          |
| 22      | 1.5                   | 3.2101                | 5.1659         | 0.29037               | 4.96          |

<sup>a</sup> Fifty DSA acquisitions were included. For each patient, several measures of x-ray flow were performed.
